# Supplementary material for: Enhanced hydrogen desorption from Mg(BH4)2 by combining nanoconfinement and a Ni catalyst
Source: Royal Society of Chemistry journal article supplement (doi:10.1039/c2ta00899h), 2013-01-01
Supplement: c2ta00899h.pdf [file c2ta00899h.pdf]

## Enhanced hydrogen desorption of $\text{Mg}(\text{BH}_4)_2$ by combining nanoconfinement and Ni catalyst

M Abdul Wahab,<sup>a</sup> Yi (Alec) Jia,<sup>a</sup> Dongjiang Yang,<sup>b</sup> Huijun Zhao<sup>c</sup> and Xiangdong Yao<sup>\*a,b</sup>

<sup>a</sup> ARC centre for functional Nanomaterials, The University of Queensland, St Lucia, QLD 4072,  
Australia

<sup>b</sup> Queensland Micro and Nanotechnology, Griffith University, Nathan campus, QLD 4111,  
Australia

Centre for Clean Energy and Environment, Griffith University, Gold Coast, QLD4222, Australia

E-mail: [x.yao@griffith.edu.au](mailto:x.yao@griffith.edu.au)

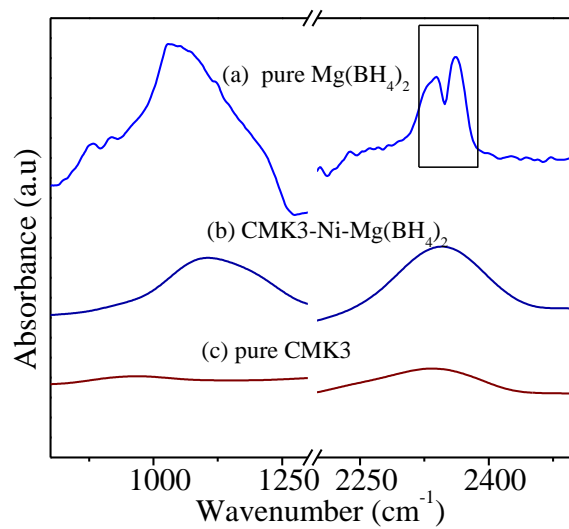

**Fig. 1S.** FT-IR spectra of (a) pure Mg(BH<sub>4</sub>)<sub>2</sub>, (b) CMK3-Ni-Mg(BH<sub>4</sub>)<sub>2</sub>, at 350 °C, and (c) pure CMK3.
